# Supplementary material
Source: PubMed Central journal article supplement (PMC4282927)
Supplement: NIHMS641478-supplement-10858_2014_9870_MOESM1_ESM.pdf [file NIHMS641478-supplement-10858_2014_9870_MOESM1_ESM.pdf]

*Supporting Information for*

**Fast Magic Angle Spinning NMR with Heteronucleus Detection for Resonance  
Assignments and Structural Characterization of Fully Protonated Proteins**

*Changmiao Guo,<sup>1</sup> Guangjin Hou,<sup>1</sup> Xingyu Lu,<sup>1</sup> Bernie O'Hare,<sup>2</sup> Jochem Struppe,<sup>2</sup> and Tatyana Polenova<sup>1\*</sup>*

*<sup>1</sup>Department of Chemistry and Biochemistry, University of Delaware, Newark, DE 19716, United States; <sup>2</sup>Bruker Biospin Corp., Billerica, MA 01821, United States*

**AUTHOR EMAIL ADDRESS:** [cmguo@udel.edu](mailto:cmguo@udel.edu), [hou@udel.edu](mailto:hou@udel.edu), [luxingyu@udel.edu](mailto:luxingyu@udel.edu),  
[Bernie.O'Hare@bruker-biospin.com](mailto:Bernie.O'Hare@bruker-biospin.com), [Jochem.Struppe@bruker-biospin.com](mailto:Jochem.Struppe@bruker-biospin.com),  
[tpolenova@udel.edu](mailto:tpolenova@udel.edu)

**RECEIVED DATE:**

**CORRESPONDING AUTHORS:** Tatyana Polenova, Department of Chemistry and Biochemistry, University of Delaware, Newark, DE 19716, email: [tpolenov@udel.edu](mailto:tpolenov@udel.edu), Tel (302) 831-1968, FAX (302) 831-6335.

**Table S1.** Acquisition and processing parameters for the 3D heteronuclear-detected and 2D HETCOR MAS NMR spectra.

| Experiment                                                                                                | Acquisition parameters                       |                                              |                                | Processing parameters             |                                                                                 |                                                                                 |
|-----------------------------------------------------------------------------------------------------------|----------------------------------------------|----------------------------------------------|--------------------------------|-----------------------------------|---------------------------------------------------------------------------------|---------------------------------------------------------------------------------|
|                                                                                                           | $\omega_3$                                   | $\omega_2$                                   | $\omega_1$                     | $\omega_3$                        | $\omega_2$                                                                      | $\omega_1$                                                                      |
| <i>5mM Cu(II)-EDTA doped U-<sup>13</sup>C, <sup>15</sup>N-LC8, 19.9 T, <math>\omega_r = 62</math> kHz</i> |                                              |                                              |                                |                                   |                                                                                 |                                                                                 |
| HNCA                                                                                                      | 2064 complex;<br>SW = 64.1 kHz;<br>256 scans | 24 complex;<br>SW = 7.5 kHz;                 | 48 complex;<br>SW = 5.0 kHz;   | 30-degree/60-<br>degree sinebell; | forward linear<br>prediction of 40<br>points; 30-degree/60-<br>degree sinebell; | forward linear<br>prediction of 80<br>points; 30-degree/60-<br>degree sinebell; |
| HNCO                                                                                                      | 2064 complex;<br>SW = 64.1 kHz;<br>128 scans | 24 complex;<br>SW = 7.5 kHz;                 | 48 complex;<br>SW = 5.0 kHz;   | 30-degree/60-<br>degree sinebell; | forward linear<br>prediction of 40<br>points; 30-degree/60-<br>degree sinebell; | forward linear<br>prediction of 80<br>points; 30-degree/60-<br>degree sinebell; |
| HNCOCX                                                                                                    | 2064 complex;<br>SW = 64.1 kHz;<br>512 scans | 24 complex;<br>SW = 7.5 kHz;                 | 48 complex;<br>SW = 5.0 kHz;   | 30-degree/60-<br>degree sinebell; | forward linear<br>prediction of 40<br>points; 30-degree/60-<br>degree sinebell; | forward linear<br>prediction of 80<br>points; 30-degree/60-<br>degree sinebell; |
| <i>5mM Cu(II)-EDTA doped U-<sup>13</sup>C, <sup>15</sup>N-LC8, 19.9 T, <math>\omega_r = 60</math> kHz</i> |                                              |                                              |                                |                                   |                                                                                 |                                                                                 |
| <sup>13</sup> C-detected<br>HETCOR                                                                        |                                              | 2048 complex;<br>SW = 64.1 kHz;<br>128 scans | 128 complex;<br>SW = 20.0 kHz; |                                   | 30-degree sinebell;                                                             | forward linear<br>prediction of 128<br>points; 30-degree<br>sinebell;           |
| <sup>1</sup> H-detected<br>HETCOR                                                                         |                                              | 1024 complex;<br>SW = 34.5 kHz;<br>32 scans  | 512 complex;<br>SW = 45.0 kHz; |                                   | 30-degree sinebell;                                                             | forward linear<br>prediction of 512<br>points; 30-degree<br>sinebell;           |

**Table S2.** Additional chemical shifts of 5mM Cu(II)-EDTA doped U-<sup>13</sup>C, <sup>15</sup>N-LC8 assigned based on 3D <sup>13</sup>C-detected MAS NMR HNCA, HNC0 and HNCOCX spectra.

| Residue | C $\gamma$ (ppm) | C $\gamma$ 1 (ppm) | C $\gamma$ 2 (ppm) | C $\delta$ (ppm) | C $\epsilon$ (ppm) | C $\zeta$ (ppm) |
|---------|------------------|--------------------|--------------------|------------------|--------------------|-----------------|
| I38     |                  |                    | 17.9               |                  |                    |                 |
| I42     |                  | 28.8               |                    |                  |                    |                 |
| N51     | 180.5            |                    |                    |                  |                    |                 |
| T70     |                  |                    | 21.5               |                  |                    |                 |
| F86     | 138.4            |                    |                    | 131.6            | 131.0              | 130.2           |

**Table S3.**  $^1\text{H}$  and  $^{13}\text{C}$  linewidths of cross peaks in  $^1\text{H}_\text{N}$ - $^{13}\text{C}\alpha$  regions of 2D  $^{13}\text{C}$ -detected HETCOR and  $^1\text{H}$ -detected HETCOR spectra.

| Chemical Shifts (ppm) |                 | Linewidths (Hz)                  |                 |                               |                 |
|-----------------------|-----------------|----------------------------------|-----------------|-------------------------------|-----------------|
| $^1\text{H}$          | $^{13}\text{C}$ | $^1\text{H}$                     | $^{13}\text{C}$ | $^1\text{H}$                  | $^{13}\text{C}$ |
|                       |                 | $^{13}\text{C}$ -detected HETCOR |                 | $^1\text{H}$ -detected HETCOR |                 |
| 9.4                   | 56.8            | 354                              | 208             | 411                           | 205             |
| 9.4                   | 58.5            | 427                              | 185             | 418                           | 189             |
| 9.1                   | 55.9            | 455                              | 152             | 525                           | 196             |
| 8.9                   | 61.5            | 269                              | 122             | 322                           | 143             |
| 8.8                   | 55.1            | 401                              | 129             | 499                           | 149             |
| 8.7                   | 62.5            | 475                              | 121             | 463                           | 169             |
| 8.6                   | 59.4            | 747                              | 177             | 803                           | 233             |
| 8.4                   | 55.3            | 384                              | 177             | 350                           | 174             |
| 8.3                   | 54.0            | 504                              | 186             | 415                           | 207             |
| 8.3                   | 56.9            | 812                              | 179             | 768                           | 182             |
| 8.3                   | 60.2            | 642                              | 201             | 581                           | 210             |
| 8.2                   | 62.6            | 390                              | 172             | 671                           | 178             |
| 8.1                   | 59.2            | 540                              | 204             | 606                           | 192             |
| 8.0                   | 61.8            | 448                              | 199             | 526                           | 225             |
| 8.0                   | 70.6            | 396                              | 130             | 298                           | 186             |
| 7.9                   | 57.9            | 364                              | 198             | 333                           | 213             |
| 7.8                   | 60.1            | 1100                             | 237             | 1192                          | 259             |
| 7.8                   | 65.2            | 280                              | 197             | 226                           | 189             |
| 7.7                   | 59.0            | 376                              | 712             | 375                           | 285             |
| 7.7                   | 52.4            | 506                              | 143             | 674                           | 153             |
| 7.6                   | 63.6            | 700                              | 194             | 805                           | 186             |
| 7.6                   | 66.1            | 923                              | 397             | 839                           | 498             |
| 7.5                   | 57.0            | 368                              | 155             | 328                           | 157             |
| 7.4                   | 61.7            | 391                              | 235             | 415                           | 240             |
| 7.4                   | 60.7            | 373                              | 209             | 328                           | 234             |
| 7.3                   | 57.9            | 308                              | 132             | 296                           | 145             |
| 7.2                   | 69.9            | 240                              | 139             | 296                           | 239             |
| 7.2                   | 71.8            | 357                              | 161             | 347                           | 167             |
| 7.2                   | 65.8            | 366                              | 169             | 410                           | 177             |
| 7.2                   | 66.9            | 379                              | 149             | 327                           | 174             |
| 7.0                   | 63.0            | 513                              | 282             | 547                           | 215             |
| 7.0                   | 67.4            | 443                              | 143             | 471                           | 192             |
| 6.9                   | 68.7            | 237                              | 124             | 227                           | 134             |
| 6.8                   | 57.1            | 358                              | 130             | 344                           | 139             |

*Note: The linewidths are extracted from spectra processed with 60-degree sinebell apodization.*
